# Supplementary material for: MoS2 quantum dots featured fluorescent biosensor for multiple detection of cancer
Source: Royal Society of Chemistry journal article supplement (doi:10.1039/c7ra09300d), 2017-01-01
Supplement: c7ra09300d1.pdf [file c7ra09300d1.pdf]

Electronic Supplementary Material (ESI) for RSC advances.  
This journal is © The Royal Society of Chemistry 2017

## MoS<sub>2</sub> quantum dots featured fluorescent biosensor for multiple detection of cancer

Yuhong Liu, Jinzha Zhang, Yang Shen, Jinduo Yan, Zaiying Hou, Chun Mao,

Wenbo Zhao\*

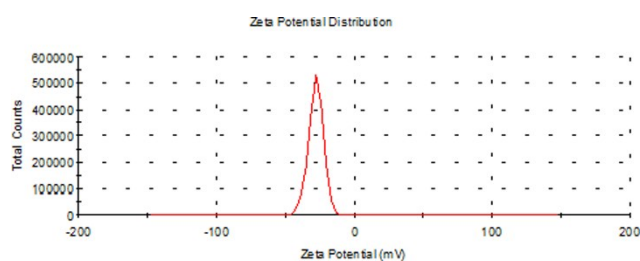

Fig. S1 Zeta potential of the obtained MoS<sub>2</sub> QDs.

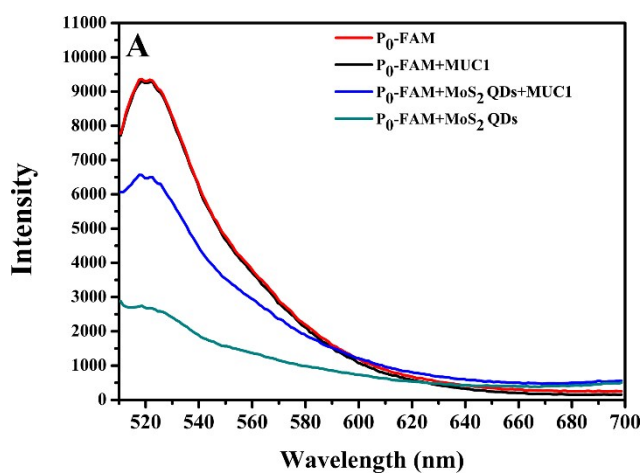

Fig. S2 FL spectrogram of the biosensor.

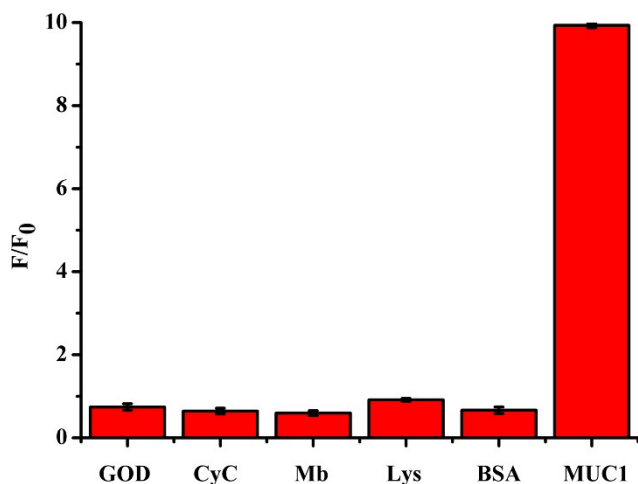

Fig. S3 The fluorescence response of MoS<sub>2</sub> QDs featured fluorescent biosensor to different protein in phosphate buffer solution (pH 7.4).

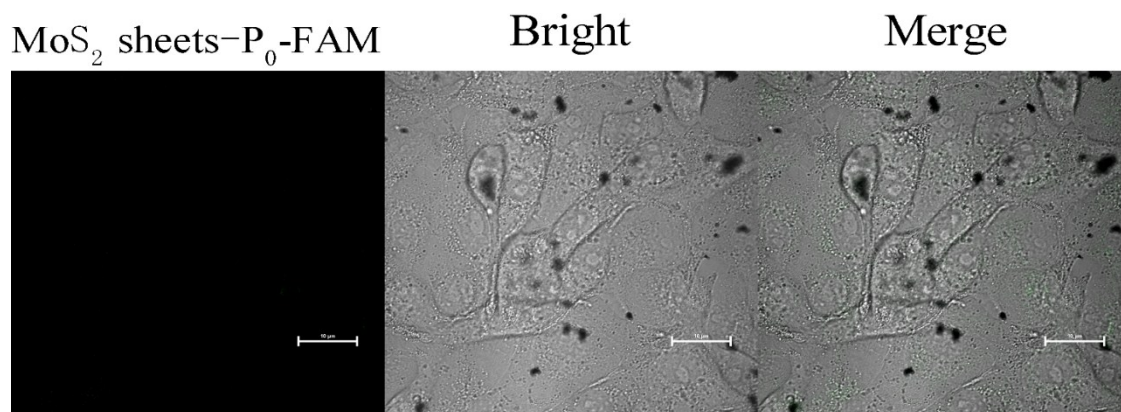

Fig. S4 Confocal fluorescence microphotograph of MCF-7 cells incubated with MoS<sub>2</sub> sheets featured fluorescent biosensor for 1h.

Table S1. Comparison between current work and some relative researches for MUC1 detection.

| Test method  | Sensing range                           | Detection limit | Reference |
|--------------|-----------------------------------------|-----------------|-----------|
| EC           | 10 <sup>-3</sup> -1 μM                  | 0.827 nM        | 1         |
| ECL          | 10 <sup>-3</sup> -10 <sup>3</sup> pg/mL | 0.62 fg/mL      | 2         |
| ECL          | 10 <sup>-3</sup> -10 <sup>4</sup> pg/mL | 0.23 fg/mL      | 3         |
| Fluorescence | 0.8-39.7 μM                             | 250 nM          | 4         |
| Fluorescence | 0.04-10 μM                              | 28 nM           | 5         |
| Fluorescence | 1 nM-10 μM                              | 0.5 nM          | This work |

## References

1. C. Deng, X. Pi, P. Qian, X. Chen, W. Wu and J. Xiang, *Analytical Chemistry*, 2017, **89**, 966-973.
2. X. Jiang, H. Wang, H. Wang, Y. Zhuo, R. Yuan and Y. Chai, *Analytical Chemistry*, 2017, **89**, 4280-4286.
3. S. K. Li, A. Y. Chen, X. X. Niu, Z. T. Liu, M. Du, Y. Q. Chai, R. Yuan and Y. Zhuo, *Chemical Communications*, 2017, **53**, 9624-9627.
4. A. K. H. Cheng, H. Su, Y. A. Wang and H. Z. Yu, *Analytical Chemistry*, 2009, **81**, 6130-6139.
5. Y. He, Y. Lin, H. Tang and D. Pang, *Nanoscale*, 2012, **4**, 2054-2059.
